# Supplementary material for: The influence of high glucose conditions on macrophages and its effect on the autophagy pathway
Source: PubMed Central journal article supplement (PMC10130370; doi:10.3389/fimmu.2023.1130662), 2023-04-12

## *Supplementary Material*

# **The Influence of High Glucose Conditions on Macrophages and Its Effect on the Autophagy Pathway**

**Emanuella S. A. Sousa<sup>1</sup>, Luiz A. D. Queiroz<sup>1</sup>, João P. T. Guimarães<sup>1</sup>, Kamilla C. Pantoja<sup>1</sup>, Rafael S. Barros<sup>1</sup>, Sabrina Epiphany<sup>2</sup>, Joilson O. Martins<sup>1\*</sup>**

<sup>1</sup> Laboratory of Immunoendocrinology, School of Pharmaceutical Sciences, Department of Clinical and Toxicological Analyses, University of São Paulo, São Paulo, SP, Brazil.

<sup>2</sup> Laboratory of Malaria Cellular and Molecular Immunopathology, School of Pharmaceutical Sciences, Department of Clinical and Toxicological Analyses, University of São Paulo, São Paulo, SP, Brazil.

### **\* Corresponding authors**

Joilson O. Martins, PhD  
Laboratory of Immunoendocrinology  
Department of Clinical and Toxicological Analyses  
School of Pharmaceutical Sciences  
University of São Paulo, Sao Paulo, Brazil  
Av. Prof. Lineu Prestes 580 - Bloco 17  
05508-000, São Paulo, SP, Brazil  
Phone 55-11-3091-3662  
FAX 55-11-3813-2197  
e-mail: [martinsj@usp.br](mailto:martinsj@usp.br)

**Keywords: Inflammation, Diabetes *mellitus*, Hyperglycemia, Autophagy**

### 1. Supplementary Figure

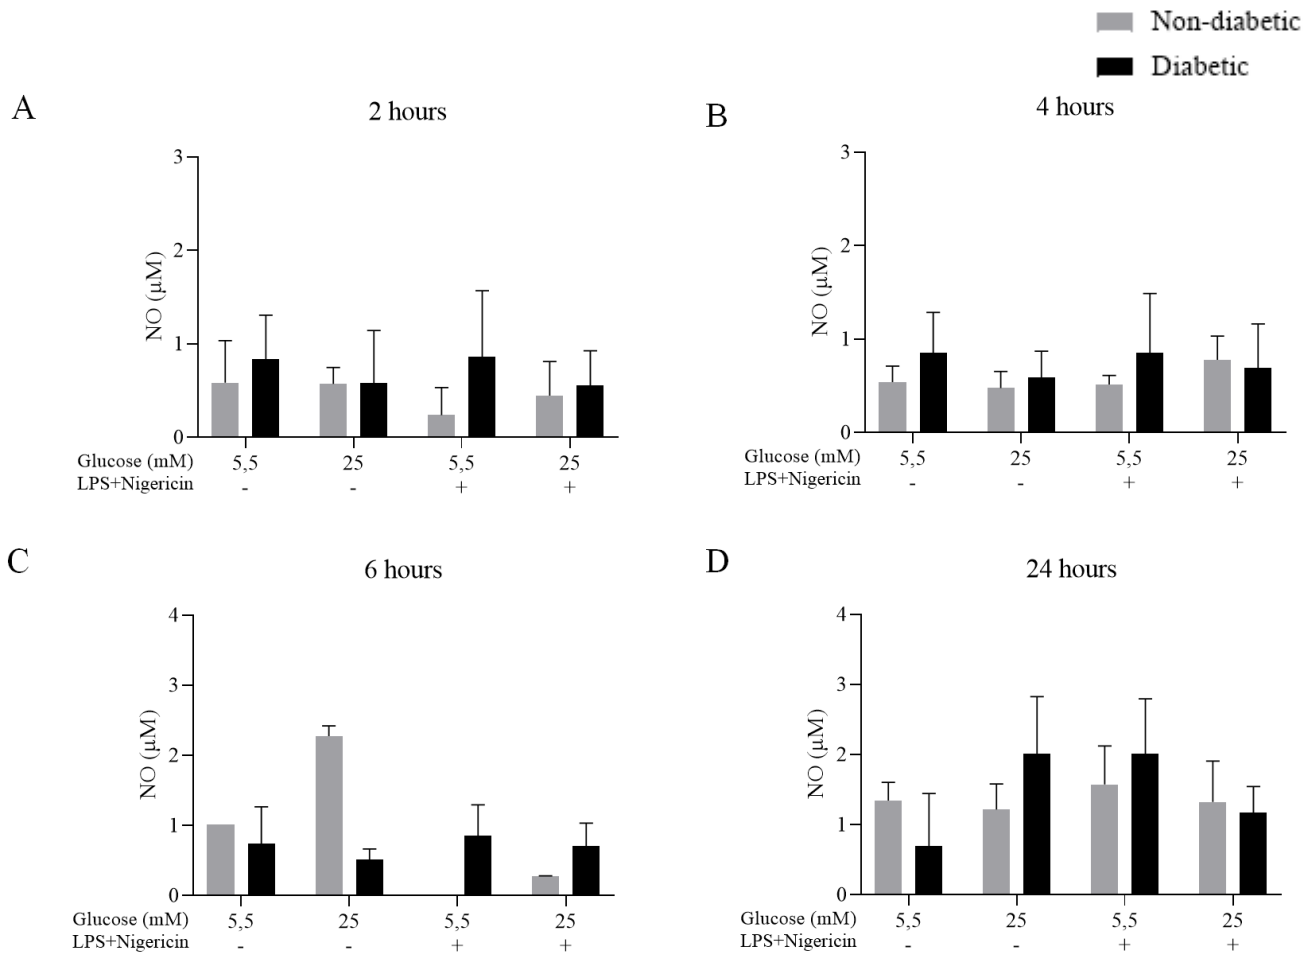

**Supplementary Figure 1.** Nitric Oxide (NO) secretion by ND-BMDM and D-BMDM with Nigericin priming and LPS stimulation. Release of nitric oxide after (A) 2 hours with different glucose concentrations. (B) 4 hours with different glucose concentrations. (C) 6 hours with different glucose concentrations. (D) 24 hours with different glucose concentrations. Nitric oxide dosage was performed by Griess reaction. Results represent mean  $\pm$  SEM. N = 6-8.

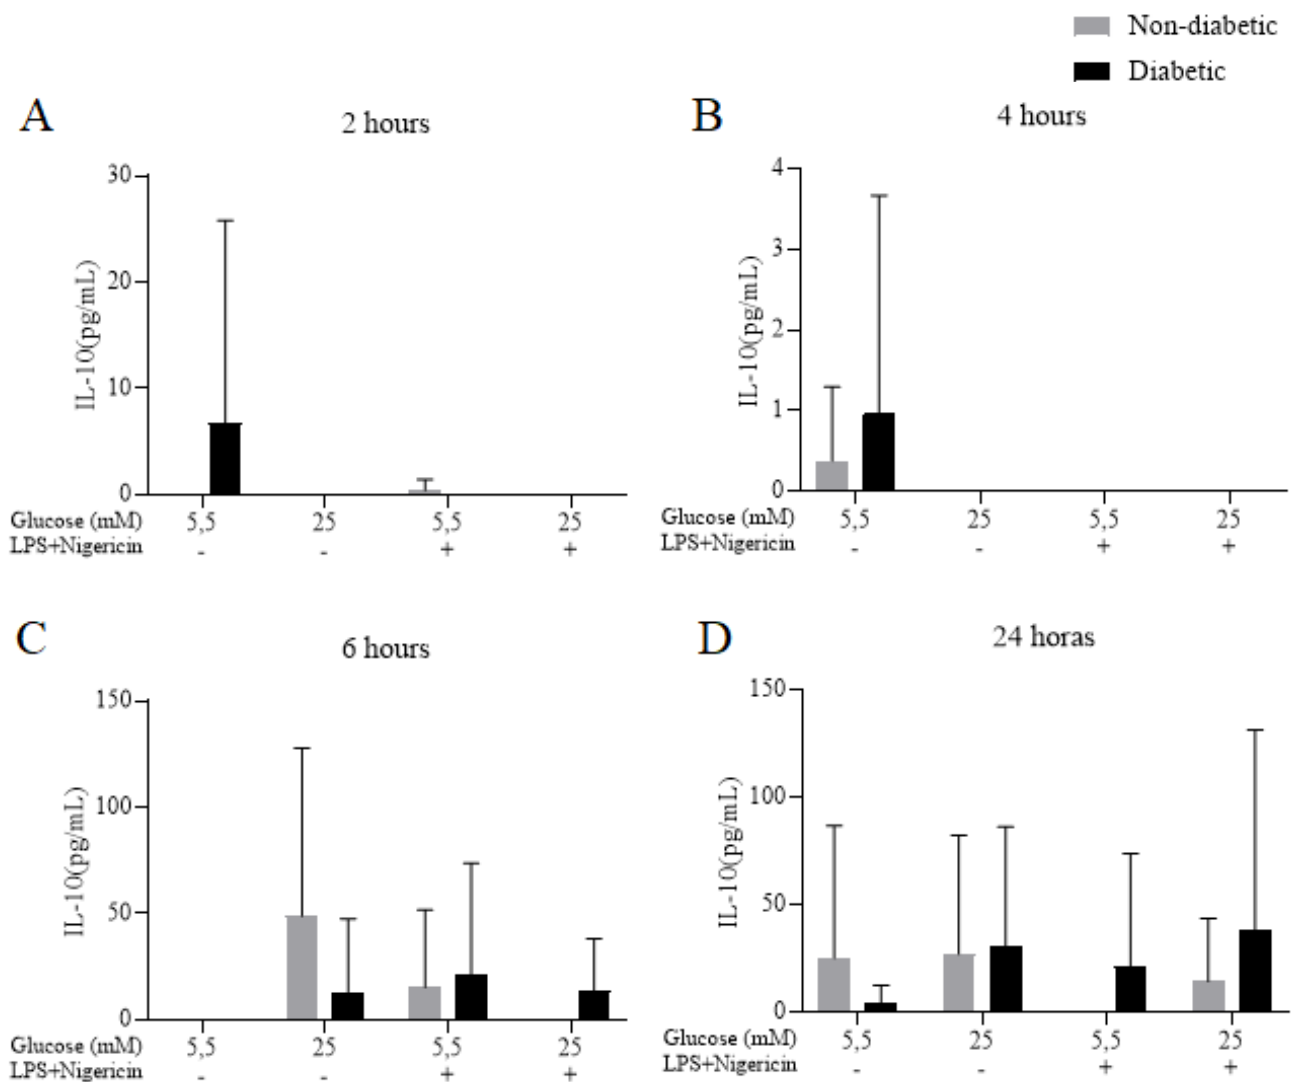

**Supplementary Figure 2.** IL-10 secretion by ND-BMDM and D-BMDM with Nigericin priming and LPS stimulation. Release of IL-10 after (A) 2 hours with different glucose concentrations. (B) 4 hours with different glucose concentrations. (C) 6 hours with different glucose concentrations. (D) 24 hours with different glucose concentrations. IL-10 measurement was performed by enzyme-linked immunosorbent assay. Results represent mean  $\pm$  SEM. N = 6-8.

**Supplementary Figure 3.** Western blot membranes probed with anti-mouse Beclin1, anti-mouse LC3b and anti-mouse  $\beta$ -actin.

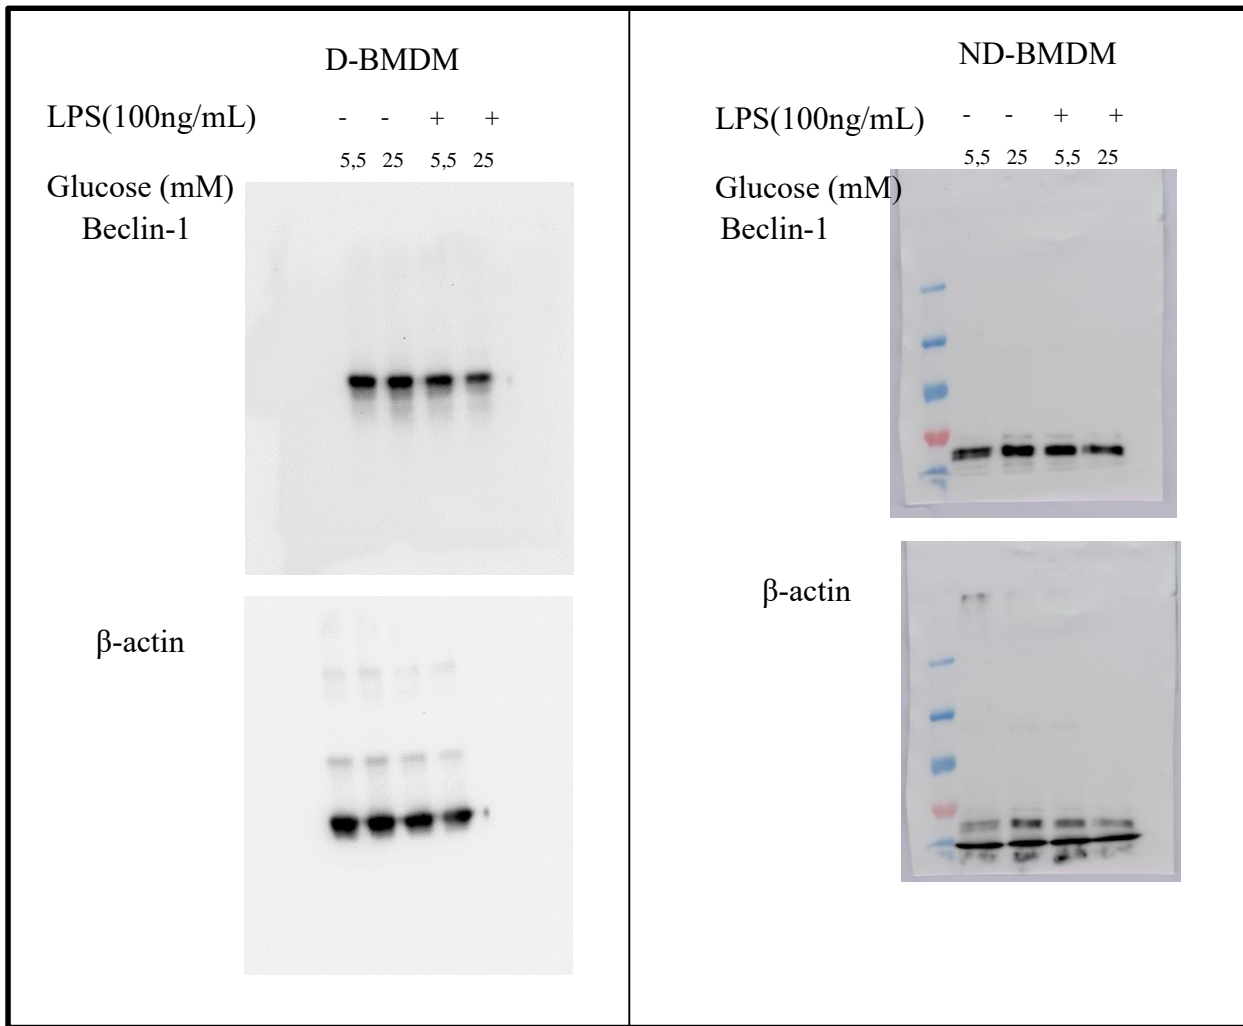

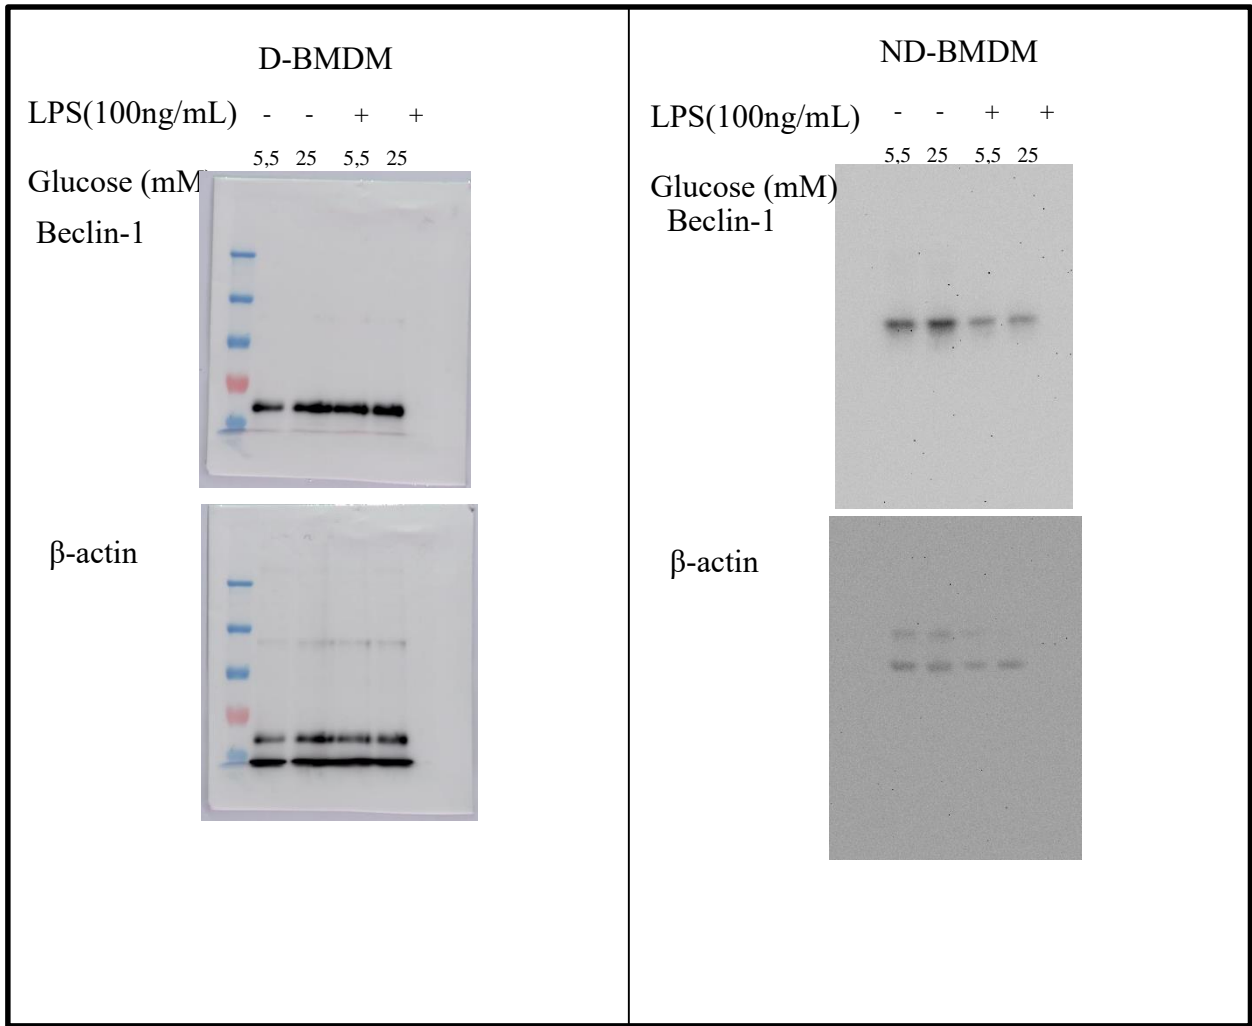

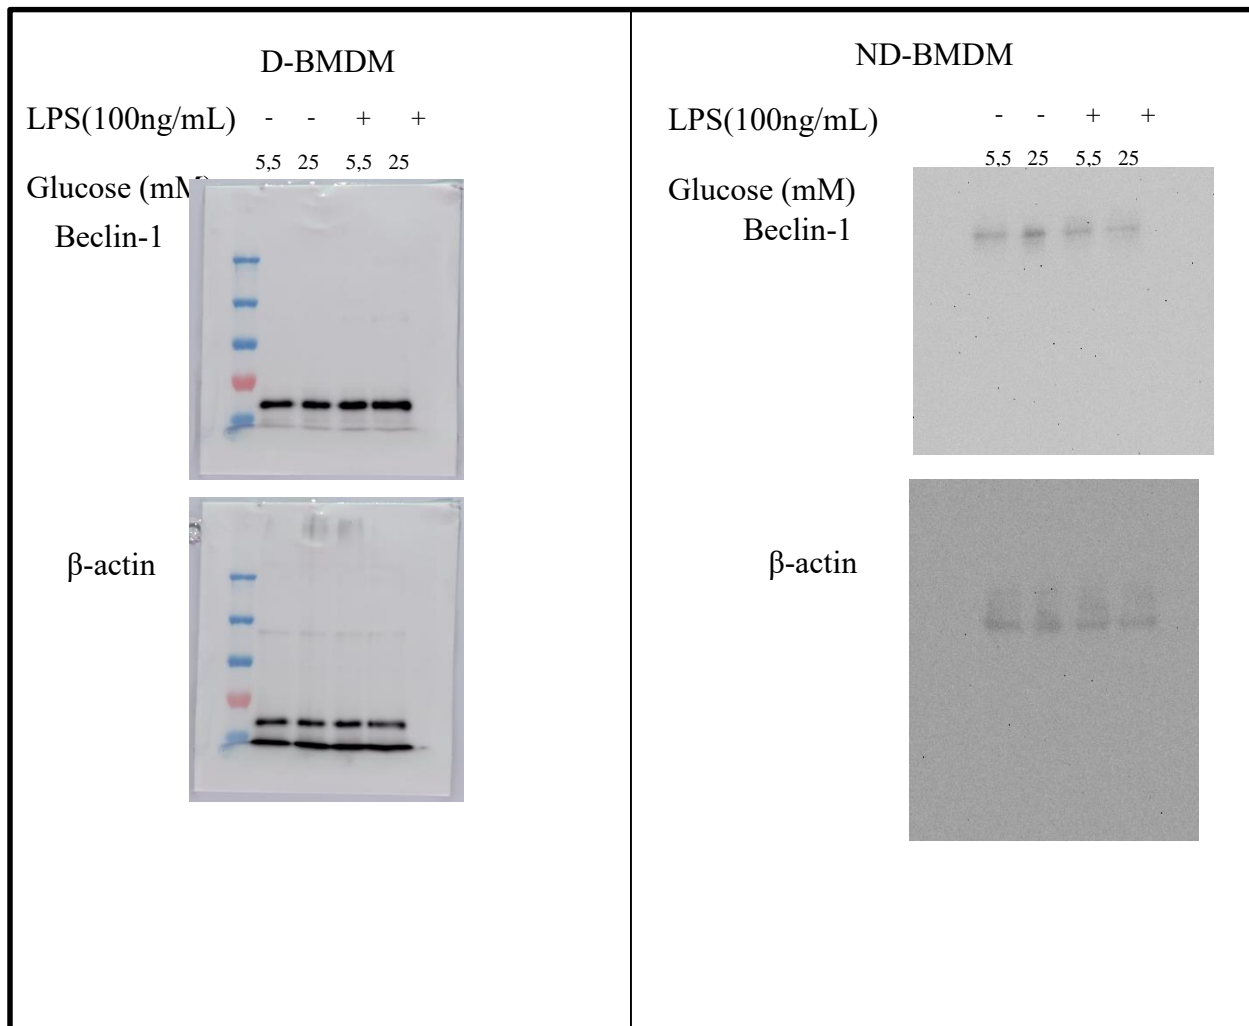

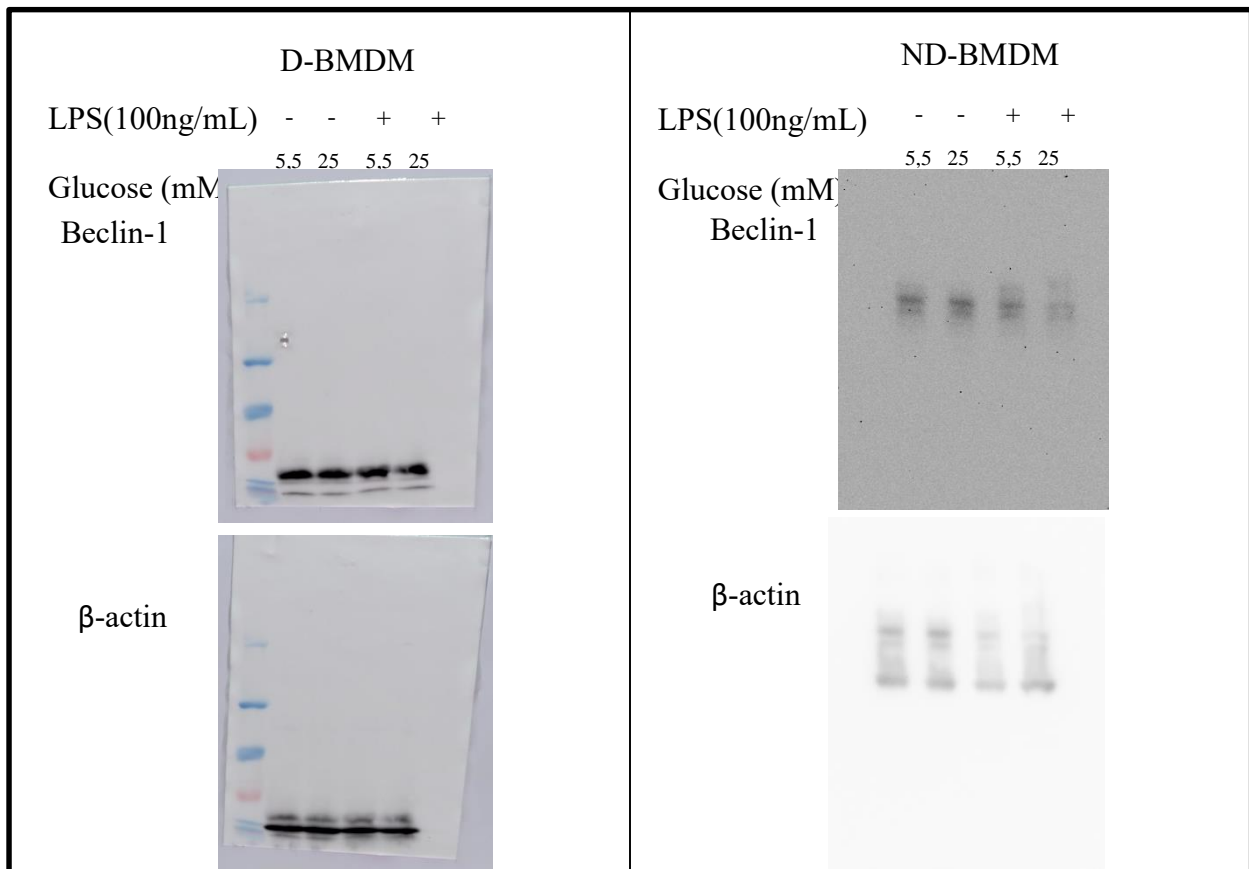

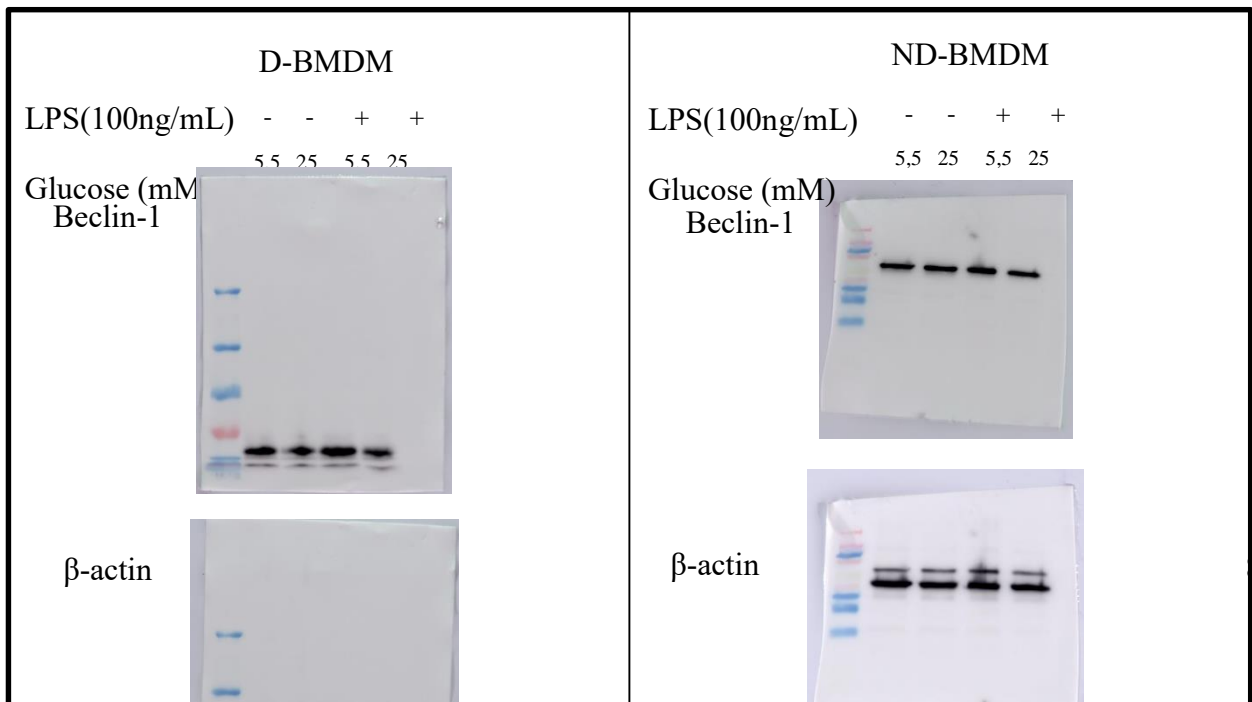





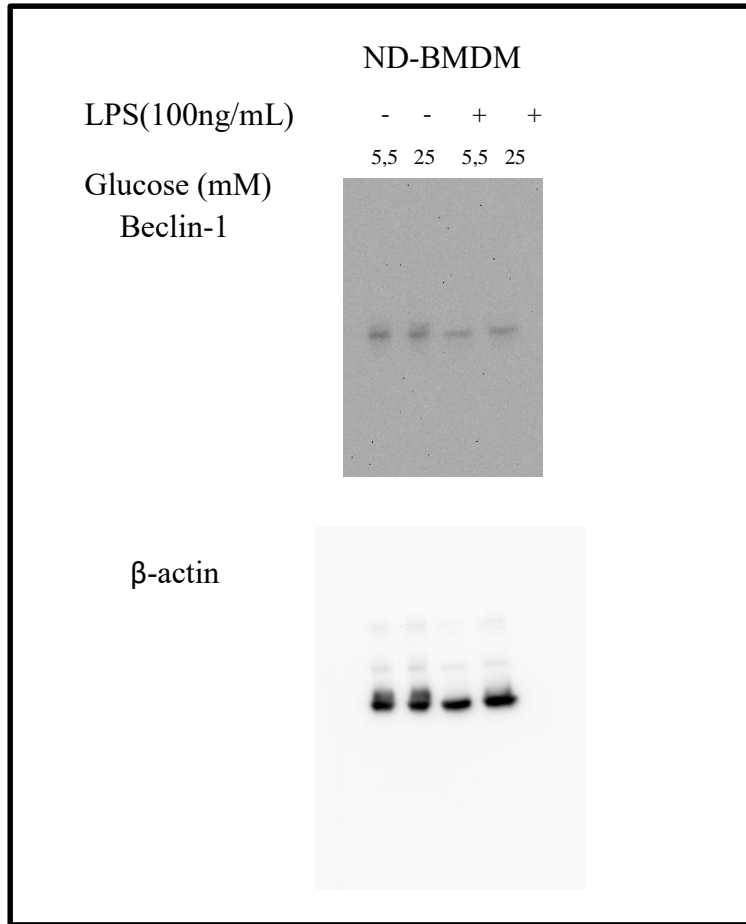

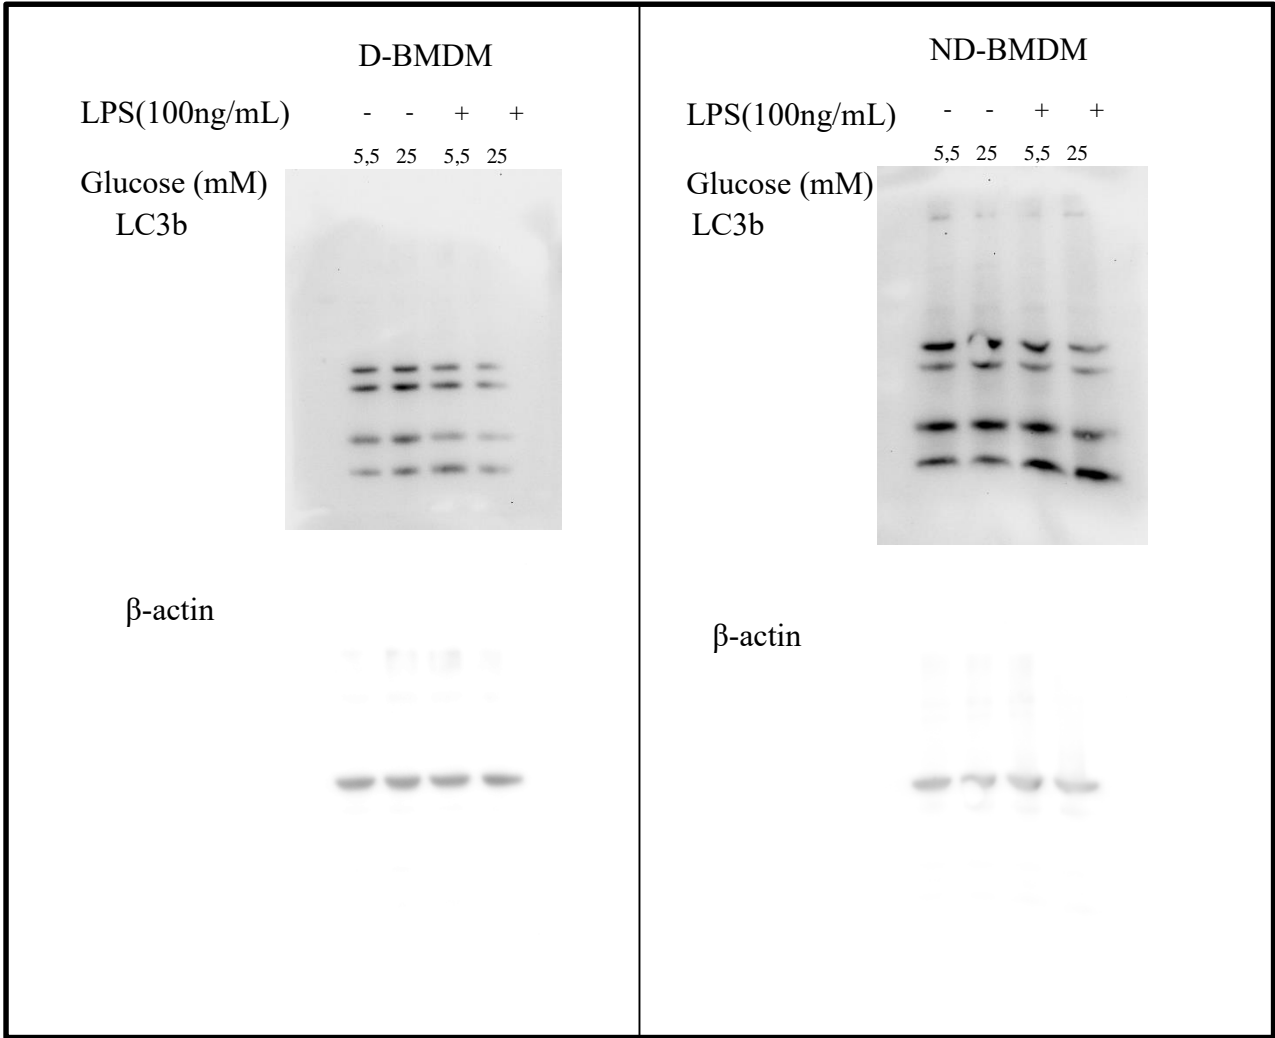

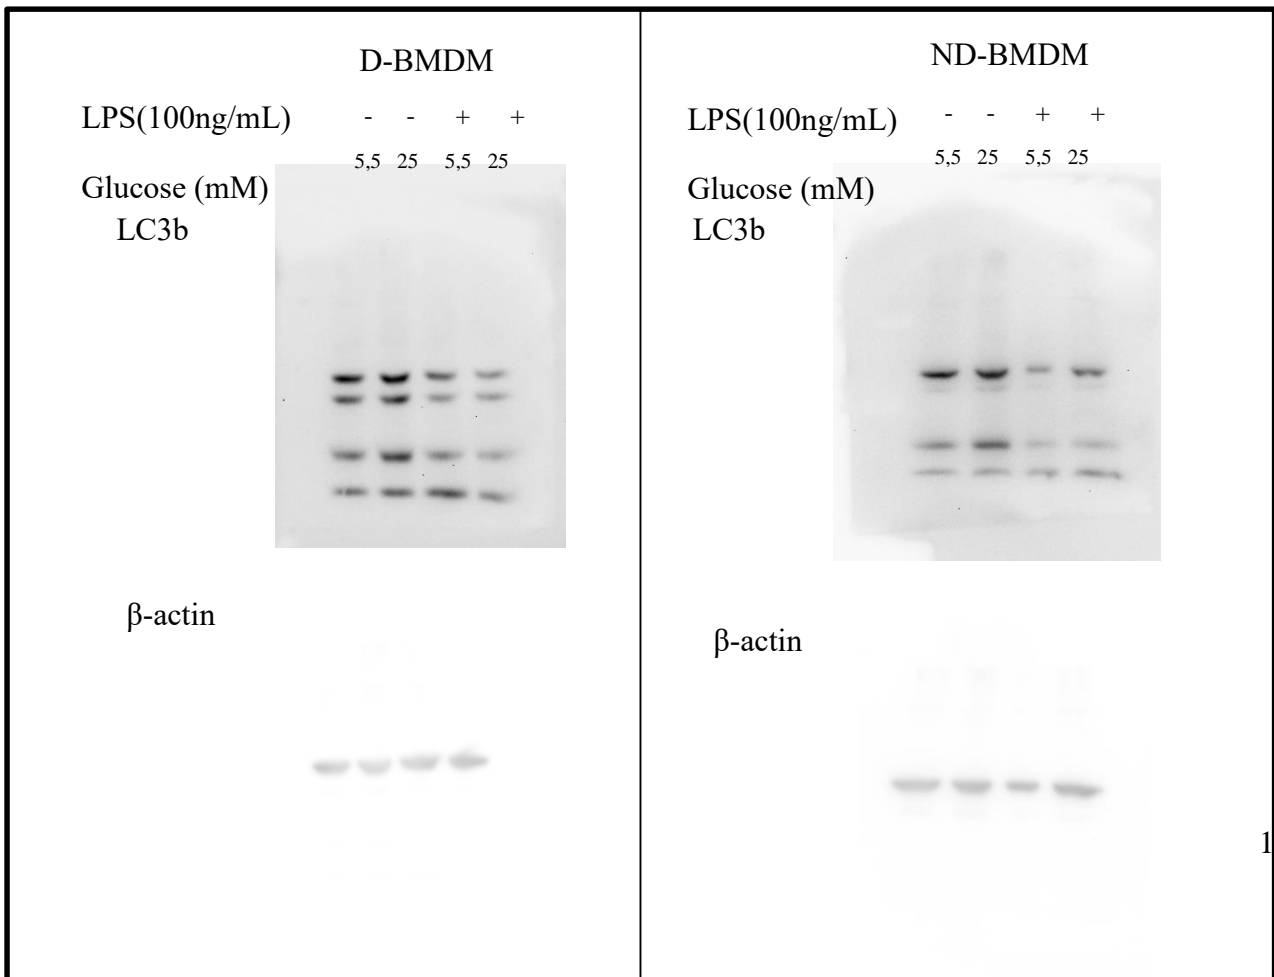

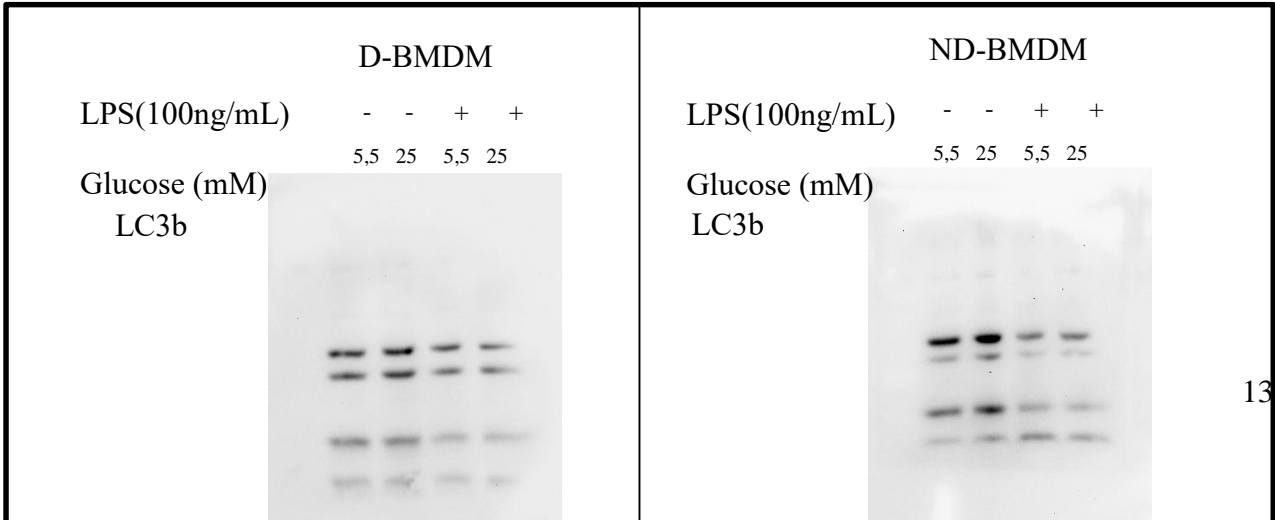



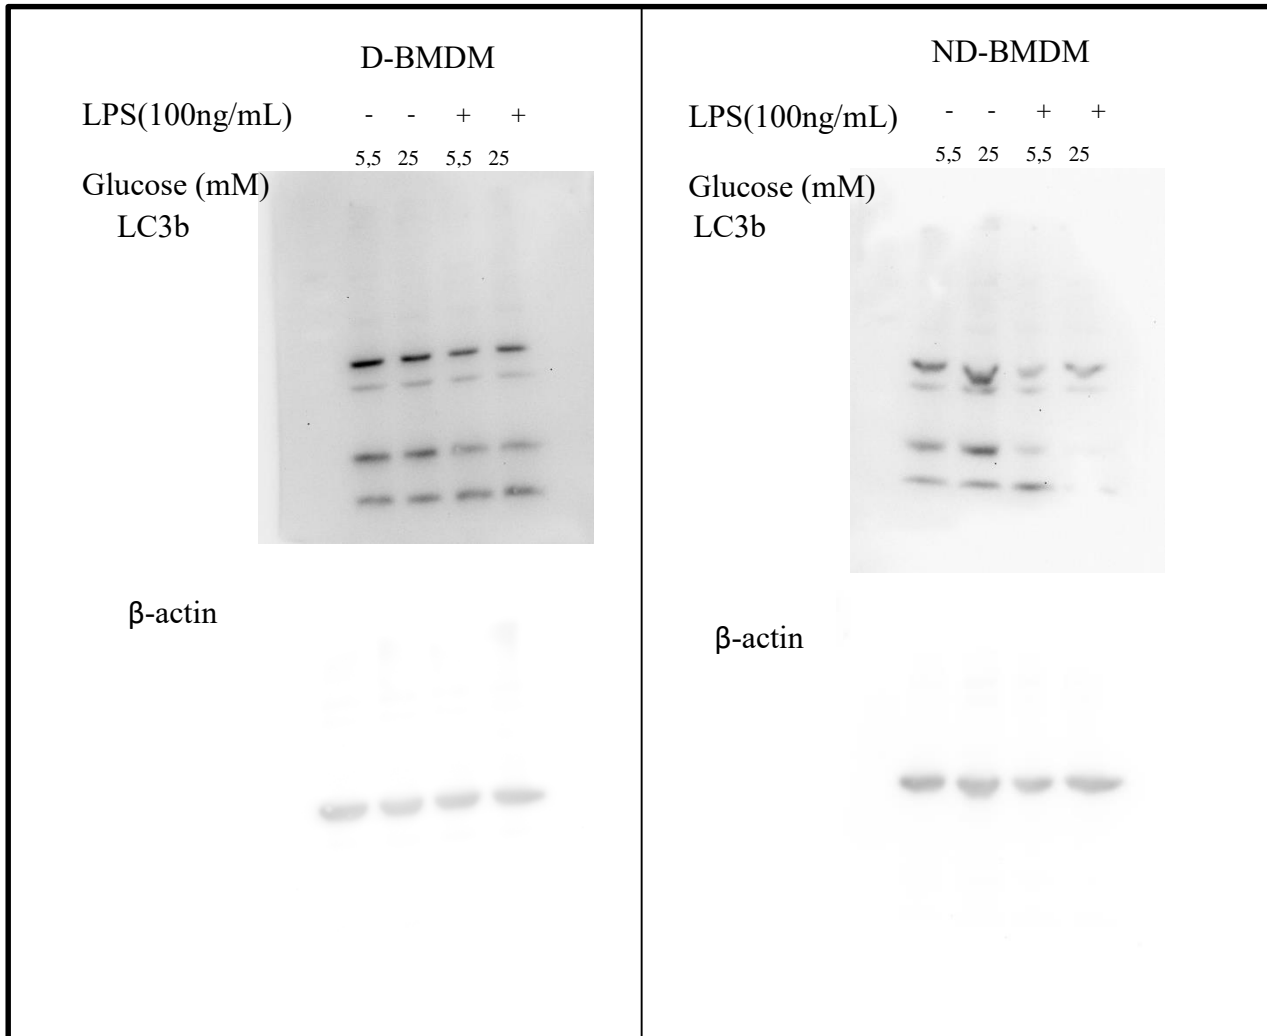

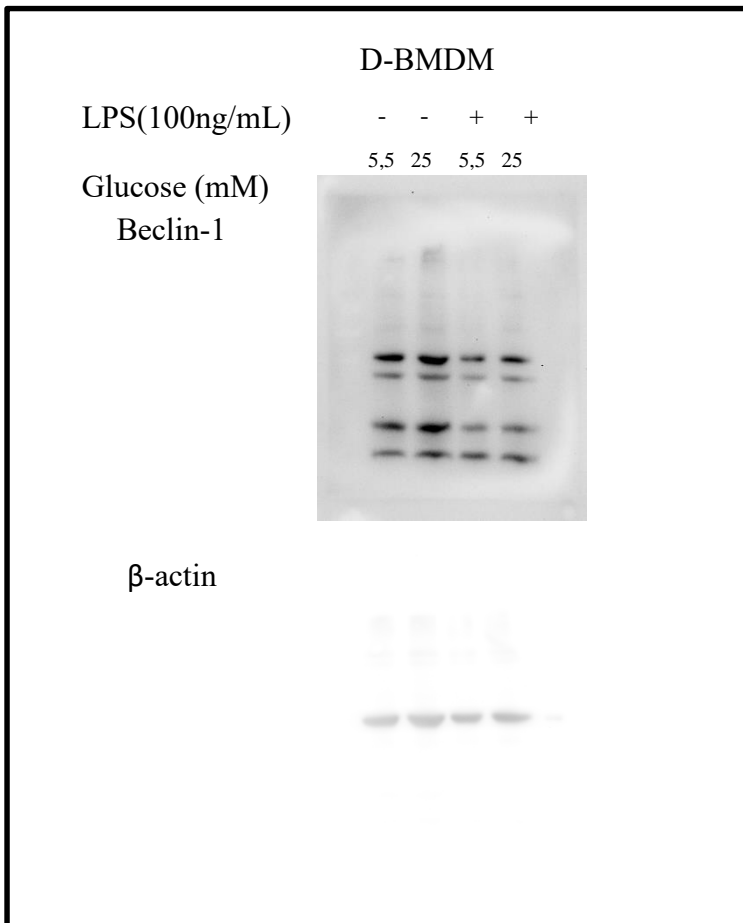

Supplement: DataSheet_1.pdf [file DataSheet_1.pdf]
